# Supplementary material for: Proteomic screening of molecular targets of crocin
Source: PubMed Central journal article supplement (PMC3922837; doi:10.1186/2008-2231-22-5), 2014-01-06
Supplement: 2008-2231-22-5-S1.pdf [file 2008-2231-22-5-S1.pdf]

# Results from MASCOT search

## 1. Beta-actin-like protein 2

### Analysis Information

Report Type Protein-Peptide Summary by Spot Analysis Type Combined (MS+MSMS)  
 Sample Set Name 2011-05-04 [001300010097-2011-03-18-1] Database SwissProt  
 Analysis Name Khalil-Medical Chemistry[Mus Swissprot] Creation Date 05/04/2011 13:12:29  
 Reported By 05/04/2011 17:22:24 - admin Last Modified 05/04/2011 13:18:54  
 MS Acq.: Proc. Methods (Unspecified): (Unspecified)  
 Interpretation Method (Unspecified)

| Rank | Protein Name                                                       | Accession No.                       | Protein Score | Protein Score C.I. % | Total Ion Score | Total Ion C. I. % | Protein MW | Protein PI | Spot Name | Process Status Spectra | Analysis Succeeded | Pep. User name | Department          |
|------|--------------------------------------------------------------------|-------------------------------------|---------------|----------------------|-----------------|-------------------|------------|------------|-----------|------------------------|--------------------|----------------|---------------------|
| 1    | RecName: Full=Beta-actin-like protein 2; AltName: Full=Kappa-actin | gi 81895966 sp Q8BFZ3.1 ACTBL_MOUSE | 215           | 100                  | 175             | 100               | 42319.1    | 5.3        | A-H-2     | 6                      | 6                  | Khalil         | Medicinal Chemistry |

### Peptide Information

| Calc. Mass | Obsrv. Mass | ± da   | ± ppm | Start Seq. | End Sequence Seq.      | Ion Score | C. I. % | Modification      | Rank | Result Type |
|------------|-------------|--------|-------|------------|------------------------|-----------|---------|-------------------|------|-------------|
| 923.5672   | 923.6219    | 0.0547 | 59    | 330        | 337 IAPPERK            |           |         |                   |      | Mascot      |
| 1036.6514  | 1036.7253   | 0.0739 | 71    | 328        | 336 IKIAPPER           |           |         |                   |      | Mascot      |
| 1171.571   | 1171.6542   | 0.0832 | 71    | 41         | 51 HOGVW/GMGQK         |           |         |                   |      | Mascot      |
| 1623.8411  | 1623.9576   | 0.1165 | 72    | 179        | 192 LDLAGRDLTDYLMK     |           |         |                   |      | Mascot      |
| 1639.8359  | 1639.9587   | 0.1228 | 75    | 179        | 192 LDLAGRDLTDYLMK     |           |         | Oxidation (M)[13] |      | Mascot      |
| 1790.892   | 1791.0049   | 0.1129 | 63    | 240        | 255 SYELPDGQVITIGNER   | 114       | 100     |                   |      | Mascot      |
| 1790.892   | 1791.0049   | 0.1129 | 63    | 240        | 255 SYELPDGQVITIGNER   |           |         |                   |      | Mascot      |
| 1954.0645  | 1954.1871   | 0.1226 | 63    | 97         | 114 VAPDEHPILLTEAPLNPK | 61        | 99.998  |                   |      | Mascot      |
| 1954.0645  | 1954.1871   | 0.1226 | 63    | 97         | 114 VAPDEHPILLTEAPLNPK |           |         |                   |      | Mascot      |
| 3183.6143  | 3183.8113   | 0.197  | 62    | 149        | 178 TTGMVSDSGDGVHTVPI  |           |         |                   |      | Mascot      |

## 2. Cytochrome b-c1 complex subunit 1

### Analysis Information

Report Type Protein-Peptide Summary by Spot Analysis Type Combined (MS+MSMS)  
 Sample Set Name 2011-05-04 [001300010097-2011-03-18-1] Database SwissProt  
 Analysis Name Khalil-Medical Chemistry[Mus Swissprot] Creation Date 05/04/2011 13:12:29  
 Reported By 05/04/2011 17:22:25 - admin Last Modified 05/04/2011 13:18:54  
 MS Acq.: Proc. Methods (Unspecified): (Unspecified)  
 Interpretation Method (Unspecified)

| Rank | Protein Name                                                                                        | Accession No.                      | Protein Score | Protein Score C. I. % | Total Ion Score | Total Ion C. I. % | Protein MW | Protein PI | Spot Name | Process Status Spectra | Analysis Succeeded | Pep. User name | Department          |
|------|-----------------------------------------------------------------------------------------------------|------------------------------------|---------------|-----------------------|-----------------|-------------------|------------|------------|-----------|------------------------|--------------------|----------------|---------------------|
| 1    | RecName: Full=Cytochrome b-c1 complex subunit 1, mitochondrial; AltName: Full=Complex III subunit 1 | gi 14548301 sp Q9CZ13.1 QCRI_MOUSE | 265           | 100                   | 196             | 100               | 53419.7    | 5.75       | A-L-1     | 6                      | 6                  | Khalil         | Medicinal Chemistry |

### Peptide Information

| Calc. Mass | Obsrv. Mass | ± da   | ± ppm | Start Seq. | End Sequence Seq.          | Ion Score | C. I. % | Modification            | Rank | Result Type |
|------------|-------------|--------|-------|------------|----------------------------|-----------|---------|-------------------------|------|-------------|
| 912.4396   | 912.4599    | 0.0173 | 19    | 473        | 479 SGMFWLR                |           |         | Oxidation (M)[3]        |      | Mascot      |
| 1058.5081  | 1059.5363   | 0.0282 | 27    | 473        | 480 SGMFWLRF               |           |         | Oxidation (M)[3]        |      | Mascot      |
| 1100.5735  | 1100.6115   | 0.038  | 35    | 424        | 432 IPLAEWESR              |           |         |                         |      | Mascot      |
| 1110.5426  | 1110.5802   | 0.0376 | 34    | 214        | 222 TDLTDYLNLR             |           |         |                         |      | Mascot      |
| 1202.6198  | 1202.6586   | 0.0388 | 32    | 433        | 442 IQEVDQMLR              |           |         |                         |      | Mascot      |
| 1218.6147  | 1218.6503   | 0.0358 | 29    | 433        | 442 IQEVDQMLR              |           |         | Oxidation (M)[8]        |      | Mascot      |
| 1256.6746  | 1256.7087   | 0.0321 | 26    | 423        | 432 RIPLAEWESR             | 41        | 99.719  |                         |      | Mascot      |
| 1256.6746  | 1256.7087   | 0.0321 | 26    | 423        | 432 RIPLAEWESR             |           |         |                         |      | Mascot      |
| 1538.7479  | 1538.8057   | 0.0578 | 38    | 379        | 392 LCTSATESVTRGK          |           |         | Carbamidomethyl (C)[2]  |      | Mascot      |
| 1605.7577  | 1605.7983   | 0.0406 | 25    | 296        | 269 VYEEDAVPGLTPCR         | 71        | 100     | Carbamidomethyl (C)[13] |      | Mascot      |
| 1605.7577  | 1605.7983   | 0.0406 | 25    | 296        | 269 VYEEDAVPGLTPCR         |           |         | Carbamidomethyl (C)[13] |      | Mascot      |
| 1646.8132  | 1646.8577   | 0.0445 | 27    | 112        | 126 EVESGAHLNAYSTR         |           |         |                         |      | Mascot      |
| 2053.9971  | 2054.0491   | 0.052  | 25    | 397        | 415 NALVSHLDGTTVPCEIDGR    | 84        | 100     | Carbamidomethyl (C)[14] |      | Mascot      |
| 2053.9971  | 2054.0491   | 0.052  | 25    | 397        | 415 NALVSHLDGTTVPCEIDGR    |           |         | Carbamidomethyl (C)[14] |      | Mascot      |
| 2802.3259  | 2802.3831   | 0.0572 | 22    | 112        | 134 EVESGAHLNAYSTREHTAYLTK |           |         |                         |      | Mascot      |

### 3. ATP synthase subunit beta

#### Analysis Information

Report Type Protein-Peptide Summary by Spot Analysis Type Combined (MS+MSMS)  
 Sample Set Name 2011-05-04 [001300010097-2011-03-18-1] Database SwissProt  
 Analysis Name Khalil-Medicinal Chemistry[Mus Swissprot] Creation Date 05/04/2011 13:12:29  
 Reported By 05/04/2011 17:22:26 - admin Last Modified 05/04/2011 13:18:54  
 MS Acq.: Proc. Methods (Unspecified): (Unspecified)  
 Interpretation Method (Unspecified)

| Gel Idx/Pos     | 328N6                                                                    | Instr./Gel Origin                  | Ak1152011-03-18-1 |                 | Process Status  | Analysis Succeeded |            |            |           |                |                     |
|-----------------|--------------------------------------------------------------------------|------------------------------------|-------------------|-----------------|-----------------|--------------------|------------|------------|-----------|----------------|---------------------|
| Plate [#/] Name | [1] 001300010097                                                         | Instrument Sample Name             |                   |                 | Spectra         | 6                  |            |            |           |                |                     |
| Rank            | Protein Name                                                             | Accession No.                      | Protein Score     | Protein C. I. % | Total Ion Score | Total Ion C. I. %  | Protein MW | Protein PI | Spot Name | Pep. User name | Department          |
| 1               | RecName: Full=ATP synthase subunit beta, mitochondrial; Flags: Precursor | gi 20455479 sp P56480.2 ATPB_MOUSE | 485               | 100             | 367             | 100                | 56265.5    | 5.19       | A-L-2     | 15 Khalil      | Medicinal Chemistry |

#### Peptide Information

| Calc. Mass | Obsrv. Mass | ± da   | ± ppm | Start Seq. | End Sequence Seq.      | Ion Score | C. I. % | Modification     | Rank | Result Type |
|------------|-------------|--------|-------|------------|------------------------|-----------|---------|------------------|------|-------------|
| 1262.6409  | 1262.7026   | 0.0617 | 49    | 110        | 121 TIAMDGTEGLVR       |           |         |                  |      | Mascot      |
| 1385.7094  | 1385.7786   | 0.0692 | 50    | 144        | 155 IMNVIGEPIDER       |           |         |                  |      | Mascot      |
| 1401.7042  | 1401.7753   | 0.0711 | 51    | 144        | 155 IMNVIGEPIDER       |           |         | Oxidation (M)[2] |      | Mascot      |
| 1406.881   | 1406.7507   | 0.0697 | 50    | 226        | 239 AHGGYSVFAGVGER     | 127       | 100     |                  |      | Mascot      |
| 1406.881   | 1406.7507   | 0.0697 | 50    | 226        | 239 AHGGYSVFAGVGER     |           |         |                  |      | Mascot      |
| 1435.7539  | 1435.8242   | 0.0703 | 49    | 311        | 324 FTQAGSEVSALLGR     |           |         |                  |      | Mascot      |
| 1439.7893  | 1439.8893   | 0.1    | 69    | 282        | 294 VALTGLTVAEYFR      |           |         |                  |      | Mascot      |
| 1601.8104  | 1601.886    | 0.0756 | 47    | 265        | 279 VALVYQGMNEPPGAR    | 55        | 99.992  |                  |      | Mascot      |
| 1601.8104  | 1601.886    | 0.0756 | 47    | 265        | 279 VALVYQGMNEPPGAR    |           |         |                  |      | Mascot      |
| 1617.8053  | 1617.8818   | 0.0765 | 47    | 265        | 279 VALVYQGMNEPPGAR    |           |         | Oxidation (M)[8] |      | Mascot      |
| 1650.9174  | 1650.9941   | 0.0767 | 46    | 95         | 109 LVLEVAQHLGESTVTR   | 78        | 100     |                  |      | Mascot      |
| 1650.9174  | 1650.9941   | 0.0767 | 46    | 95         | 109 LVLEVAQHLGESTVTR   |           |         |                  |      | Mascot      |
| 1780.9825  | 1781.047    | 0.0845 | 47    | 144        | 159 IMNVIGEPIDERGPIK   |           |         |                  |      | Mascot      |
| 1796.9575  | 1797.0184   | 0.0609 | 34    | 144        | 159 IMNVIGEPIDERGPIK   |           |         | Oxidation (M)[2] |      | Mascot      |
| 1842.8802  | 1842.9714   | 0.0912 | 49    | 407        | 422 IMPDNIIVGNEHYDVAR  |           |         |                  |      | Mascot      |
| 1858.8752  | 1858.9777   | 0.1025 | 55    | 407        | 422 IMPDNIIVGNEHYDVAR  |           |         | Oxidation (M)[2] |      | Mascot      |
| 1918.0959  | 1919.1879   | 0.092  | 48    | 125        | 143 VLDSGARPKIPVGPETLG | 107       | 100     |                  |      | Mascot      |

### 4. Tubulin beta-3 chain

#### Analysis Information

Report Type Protein-Peptide Summary by Spot Analysis Type Combined (MS+MSMS)  
 Sample Set Name 2011-05-04 [001300010097-2011-03-18-1] Database SwissProt  
 Analysis Name Khalil-Medicinal Chemistry[Mus Swissprot] Creation Date 05/04/2011 13:12:29  
 Reported By 05/04/2011 17:22:27 - admin Last Modified 05/04/2011 13:18:54  
 MS Acq.: Proc. Methods (Unspecified): (Unspecified)  
 Interpretation Method (Unspecified)

| Gel Idx/Pos     | 330N8                              | Instr./Gel Origin                 | Ak1152011-03-18-1 |                 | Process Status  | Analysis Succeeded |            |            |           |                |                     |
|-----------------|------------------------------------|-----------------------------------|-------------------|-----------------|-----------------|--------------------|------------|------------|-----------|----------------|---------------------|
| Plate [#/] Name | [1] 001300010097                   | Instrument Sample Name            |                   |                 | Spectra         | 6                  |            |            |           |                |                     |
| Rank            | Protein Name                       | Accession No.                     | Protein Score     | Protein C. I. % | Total Ion Score | Total Ion C. I. %  | Protein MW | Protein PI | Spot Name | Pep. User name | Department          |
| 1               | RecName: Full=Tubulin beta-3 chain | gi 20455323 sp Q9ERD7.1 TB3_MOUSE | 258               | 100             | 185             | 100                | 50842.4    | 4.82       | H-B-1     | 11 Khalil      | Medicinal Chemistry |

#### Peptide Information

| Calc. Mass | Obsrv. Mass | ± da    | ± ppm | Start Seq. | End Sequence Seq.  | Ion Score | C. I. % | Modification     | Rank | Result Type |
|------------|-------------|---------|-------|------------|--------------------|-----------|---------|------------------|------|-------------|
| 1069.6041  | 1069.5824   | -0.0217 | -20   | 310        | 318 YLTVATVFR      |           |         |                  |      | Mascot      |
| 1130.5953  | 1130.5734   | -0.0219 | -19   | 242        | 251 FPGQLNADLR     | 72        | 100     |                  |      | Mascot      |
| 1130.5953  | 1130.5734   | -0.0219 | -19   | 242        | 251 FPGQLNADLR     |           |         |                  |      | Mascot      |
| 1143.6343  | 1143.6111   | -0.0232 | -20   | 253        | 262 LAVNMVPPFR     | 46        | 99.865  |                  |      | Mascot      |
| 1143.6343  | 1143.6111   | -0.0232 | -20   | 253        | 262 LAVNMVPPFR     |           |         |                  |      | Mascot      |
| 1159.6293  | 1159.6006   | -0.0287 | -25   | 253        | 262 LAVNMVPPFR     | 11        | 0       | Oxidation (M)[5] |      | Mascot      |
| 1159.6293  | 1159.6006   | -0.0287 | -25   | 253        | 262 LAVNMVPPFR     |           |         | Oxidation (M)[5] |      | Mascot      |
| 1229.5983  | 1229.576    | -0.0223 | -18   | 381        | 390 ISEQFTAMFR     |           |         |                  |      | Mascot      |
| 1245.5933  | 1245.5662   | -0.0271 | -22   | 381        | 390 ISEQFTAMFR     |           |         | Oxidation (M)[8] |      | Mascot      |
| 1258.6902  | 1258.6939   | -0.0263 | -21   | 242        | 252 FPGQLNADLRK    |           |         |                  |      | Mascot      |
| 1385.6995  | 1385.6998   | -0.0297 | -21   | 381        | 391 ISEQFTAMFRR    |           |         |                  |      | Mascot      |
| 1390.8882  | 1390.8928   | -0.0354 | -25   | 325        | 336 EVDEQMLAIQSK   |           |         |                  |      | Mascot      |
| 1406.8932  | 1406.8926   | -0.0306 | -22   | 325        | 336 EVDEQMLAIQSK   |           |         | Oxidation (M)[8] |      | Mascot      |
| 1604.8406  | 1604.7898   | -0.0508 | -32   | 283        | 276 LHFFMPGFAPLTAR |           |         |                  |      | Mascot      |
| 1615.8359  | 1615.7975   | -0.0384 | -24   | 83         | 77 AILVDLEPGTMDSVR | 67        | 100     |                  |      | Mascot      |
| 1615.8359  | 1615.7975   | -0.0384 | -24   | 83         | 77 AILVDLEPGTMDSVR |           |         |                  |      | Mascot      |
| 1620.8356  | 1620.7953   | -0.0403 | -25   | 283        | 276 LHFFMPGFAPLTAR |           |         | Oxidation (M)[5] |      | Mascot      |

## 5. Tubulin beta-6 chain

### Analysis Information

Report Type Protein-Peptide Summary by Spot Analysis Type Combined (MS+MSMS)  
 Sample Set Name 2011-05-04 [001300010097-2011-03-18-1] Database SwissProt  
 Analysis Name Khalil-Medicinal Chemistry[Mus Swissprot] Creation Date 05/04/2011 13:12:29  
 Reported By 05/04/2011 17:22:27 - admin Last Modified 05/04/2011 13:18:54  
 MS Acq.: Proc. Methods (Unspecified): (Unspecified)  
 Interpretation Method (Unspecified)

| Gel Idx/Pos    | 330N8                              | Instr./Gel Origin                  | Ak1152011-03-18-1 |                       | Process Status  | Analysis Succeeded |            |                   |                |                     |
|----------------|------------------------------------|------------------------------------|-------------------|-----------------------|-----------------|--------------------|------------|-------------------|----------------|---------------------|
| Plate [#] Name | [1] 001300010097                   | Instrument Sample Name             |                   |                       | Spectra         | 6                  |            |                   |                |                     |
| Rank           | Protein Name                       | Accession No.                      | Protein Score     | Protein Score C. I. % | Total Ion Score | Total Ion C. I. %  | Protein MW | Protein Spot Name | Pep. User name | Department          |
|                | RecName: Full=Tubulin beta-6 chain | gi 68775969 sp Q922F4.1 TB66_MOUSE | 169               | 100                   | 118             | 100                | 50514.3    | 4.8 H-B-1         | 9 Kha          | Medicinal Chemistry |

### Peptide Information

| Calc. Mass | Obsrv. Mass | ± da    | ± ppm | Start Seq. | End Sequence Seq.     | Ion Score | C. I. % | Modification       | Rank | Result Type |
|------------|-------------|---------|-------|------------|-----------------------|-----------|---------|--------------------|------|-------------|
| 1069.6041  | 1069.5824   | -0.0217 | -20   | 310        | 318 YLTVTVFR          |           |         |                    |      | Mascot      |
| 1077.5323  | 1077.5089   | -0.0234 | -22   | 155        | 162 IREEYPDR          |           |         |                    |      | Mascot      |
| 1130.5963  | 1130.5734   | -0.0219 | -19   | 242        | 251 FPGQLNADLR        | 72        | 100     |                    |      | Mascot      |
| 1130.5963  | 1130.5734   | -0.0219 | -19   | 242        | 251 FPGQLNADLR        |           |         |                    |      | Mascot      |
| 1143.6343  | 1143.6111   | -0.0232 | -20   | 253        | 262 LAVNMVFPFR        | 46        | 99.865  |                    |      | Mascot      |
| 1143.6343  | 1143.6111   | -0.0232 | -20   | 253        | 262 LAVNMVFPFR        |           |         |                    |      | Mascot      |
| 1159.6293  | 1159.6006   | -0.0287 | -25   | 253        | 262 LAVNMVFPFR        | 11        |         | 0 Oxidation (M)[5] |      | Mascot      |
| 1159.6293  | 1159.6006   | -0.0287 | -25   | 253        | 262 LAVNMVFPFR        |           |         | Oxidation (M)[5]   |      | Mascot      |
| 1258.6902  | 1258.6639   | -0.0263 | -21   | 242        | 252 FPGQLNADLRK       |           |         |                    |      | Mascot      |
| 1604.8406  | 1604.7898   | -0.0508 | -32   | 263        | 276 LHFFMPGFAPLTAR    |           |         |                    |      | Mascot      |
| 1620.8356  | 1620.7953   | -0.0403 | -25   | 263        | 276 LHFFMPGFAPLTAR    |           |         | Oxidation (M)[5]   |      | Mascot      |
| 1696.8329  | 1696.7893   | -0.0436 | -26   | 337        | 350 NSSYFVVEIPNIVK    |           |         |                    |      | Mascot      |
| 1700.8862  | 1700.8041   | -0.0821 | -48   | 310        | 324 YLTVTVFRGPMVMK    |           |         |                    |      | Mascot      |
| 1958.9818  | 1958.9427   | -0.0391 | -20   | 104        | 121 GHYTEGAELVDSVLDVV |           |         |                    |      | Mascot      |

## 6. 14-3-3 protein beta/alpha

### Analysis Information

Report Type Protein-Peptide Summary by Spot Analysis Type Combined (MS+MSMS)  
 Sample Set Name 2011-05-04 [001300010097-2011-03-18-1] Database SwissProt  
 Analysis Name Khalil-Medicinal Chemistry[Mus Swissprot] Creation Date 05/04/2011 13:12:29  
 Reported By 05/04/2011 17:22:28 - admin Last Modified 05/04/2011 13:18:54  
 MS Acq.: Proc. Methods (Unspecified): (Unspecified)  
 Interpretation Method (Unspecified)

| Gel Idx/Pos    | 332N10                                                                                              | Instr./Gel Origin                  | Ak1152011-03-18-1 |                       | Process Status  | Analysis Succeeded |            |                   |                |                     |
|----------------|-----------------------------------------------------------------------------------------------------|------------------------------------|-------------------|-----------------------|-----------------|--------------------|------------|-------------------|----------------|---------------------|
| Plate [#] Name | [1] 001300010097                                                                                    | Instrument Sample Name             |                   |                       | Spectra         | 6                  |            |                   |                |                     |
| Rank           | Protein Name                                                                                        | Accession No.                      | Protein Score     | Protein Score C. I. % | Total Ion Score | Total Ion C. I. %  | Protein MW | Protein Spot Name | Pep. User name | Department          |
| 1              | RecName: Full=14-3-3 protein beta/alpha; AltName: Full=Protein kinase C inhibitor protein 1; Short= | gi 16202636 sp Q9QV8.3 1433B_MOUSE | 160               | 100                   | 104             | 100                | 28182.9    | 4.77 H-B-3        | 9 Kha          | Medicinal Chemistry |

### Peptide Information

| Calc. Mass | Obsrv. Mass | ± da    | ± ppm | Start Seq. | End Sequence Seq.   | Ion Score | C. I. % | Modification         | Rank | Result Type |
|------------|-------------|---------|-------|------------|---------------------|-----------|---------|----------------------|------|-------------|
| 903.5145   | 903.4909    | -0.0236 | -26   | 63         | 70 VISIEQK          |           |         |                      |      | Mascot      |
| 907.5247   | 907.4995    | -0.0312 | -34   | 44         | 51 NLLSVAVK         |           |         |                      |      | Mascot      |
| 916.4345   | 916.4106    | -0.0239 | -26   | 123        | 129 MKGDYFR         |           |         |                      |      | Mascot      |
| 932.4294   | 932.4056    | -0.0238 | -26   | 123        | 129 MKGDYFR         |           |         | Oxidation (M)[1]     |      | Mascot      |
| 1108.5969  | 1108.5395   | -0.0204 | -18   | 161        | 169 EMQPTPIR        |           |         |                      |      | Mascot      |
| 1124.5518  | 1124.5269   | -0.0249 | -22   | 161        | 169 EMQPTPIR        |           |         | Oxidation (M)[2]     |      | Mascot      |
| 1189.6909  | 1189.6326   | -0.0283 | -24   | 215        | 224 DSTLMQLLR       |           |         |                      |      | Mascot      |
| 1205.6959  | 1205.6271   | -0.0288 | -24   | 215        | 224 DSTLMQLLR       |           |         | Oxidation (M)[6]     |      | Mascot      |
| 1236.6517  | 1236.6395   | -0.0162 | -13   | 160        | 169 KEMQPTPIR       |           |         |                      |      | Mascot      |
| 1503.8641  | 1503.8271   | -0.037  | -25   | 44         | 57 NLLSVAVKINVGAR   |           |         |                      |      | Mascot      |
| 1598.7405  | 1598.7085   | -0.032  | -20   | 30         | 43 AVTEQGHELNEER    |           |         |                      |      | Mascot      |
| 1812.8254  | 1812.7815   | -0.0439 | -24   | 14         | 29 LAEQAERYDDMAAAMK | 104       | 100     |                      |      | Mascot      |
| 1812.8254  | 1812.7815   | -0.0439 | -24   | 14         | 29 LAEQAERYDDMAAAMK |           |         |                      |      | Mascot      |
| 1828.8204  | 1828.772    | -0.0484 | -26   | 14         | 29 LAEQAERYDDMAAAMK | 29        | 96.284  | Oxidation (M)[15]    |      | Mascot      |
| 1828.8204  | 1828.772    | -0.0484 | -26   | 14         | 29 LAEQAERYDDMAAAMK |           |         | Oxidation (M)[11]    |      | Mascot      |
| 1844.8153  | 1844.7729   | -0.0424 | -23   | 14         | 29 LAEQAERYDDMAAAMK |           |         | Oxidation (M)[11,15] |      | Mascot      |

## 7. V-type proton ATPase catalytic subunitA

### Analysis Information

|                         |                                          |               |                     |
|-------------------------|------------------------------------------|---------------|---------------------|
| Report Type             | Protein+Peptide Summary by Spot          | Analysis Type | Combined (MS+MSMS)  |
| Sample Set Name         | 2011-05-04 [001300010097-2011-03-18-1]   | Database      | SwissProt           |
| Analysis Name           | Khali-Medicinal Chemistry[Mus Swissprot] | Creation Date | 05/04/2011 13:12:29 |
| Reported By             | 05/04/2011 17:22:28 - admin              | Last Modified | 05/04/2011 13:18:54 |
| MS Acq. : Proc. Methods | (Unspecified) : (Unspecified)            |               |                     |
| Interpretation Method   | (Unspecified)                            |               |                     |

| Gel Idx/Pos    | 333N11                                                                                              | Instr./Gel Origin                  | Ak1152011-03-18-1 | Process Status       | Analysis Succeeded |                  |            |            |           |            |           |                     |
|----------------|-----------------------------------------------------------------------------------------------------|------------------------------------|-------------------|----------------------|--------------------|------------------|------------|------------|-----------|------------|-----------|---------------------|
| Plate [#] Name | [1] 001300010097                                                                                    | Instrument Sample Name             |                   | Spectra              | 6                  |                  |            |            |           |            |           |                     |
| Rank           | Protein Name                                                                                        | Accession No.                      | Protein Score     | Protein Score C.I. % | Total Ion Score    | Total Ion C.I. % | Protein MW | Protein PI | Spot Name | Pep. Count | User name | Department          |
| 1              | RecName: Full=V-type proton ATPase catalytic subunit A; Short=V-ATPase subunit A; AltName: Full=V-A | gi 14559539 sp P50516.2 VATA_MOUSE | 113               | 100                  | 79                 | 100              | 68624.7    | 5.42       | H-B-4     | 8          | Kha       | Medicinal Chemistry |

| Peptide Information |             |         |       |            |                       |           |         |                   |      |             |
|---------------------|-------------|---------|-------|------------|-----------------------|-----------|---------|-------------------|------|-------------|
| Calc. Mass          | Obsrv. Mass | ± da    | ± ppm | Start Seq. | End Sequence Seq.     | Ion Score | C. I. % | Modification      | Rank | Result Type |
| 902.5053            | 902.4855    | -0.0198 | -22   | 121        | 129 GNVVSALSR         |           |         |                   |      | Mascot      |
| 1248.6558           | 1248.6229   | -0.0329 | -26   | 203        | 212 FSMVQWVPVR        |           |         |                   |      | Mascot      |
| 1262.678            | 1262.636    | -0.042  | -33   | 130        | 139 DIKWEFIPSK        |           |         |                   |      | Mascot      |
| 1264.6508           | 1264.6208   | -0.03   | -24   | 203        | 212 FSMVQWVPVR        |           |         | Oxidation (M)[3]  |      | Mascot      |
| 1308.7271           | 1308.6749   | -0.0522 | -40   | 45         | 56 VGHSELVGEIIR       |           |         |                   |      | Mascot      |
| 1316.7434           | 1316.7129   | -0.0305 | -23   | 221        | 232 LPANHLLTGQR       | 79        | 100     |                   |      | Mascot      |
| 1316.7434           | 1316.7129   | -0.0305 | -23   | 221        | 232 LPANHLLTGQR       |           |         |                   |      | Mascot      |
| 1319.695            | 1319.647    | -0.008  | -6    | 593        | 564 RAVETTAQSDNK      |           |         |                   |      | Mascot      |
| 1515.7948           | 1515.756    | -0.0388 | -26   | 309        | 323 TALVANTSNMPVAAR   |           |         |                   |      | Mascot      |
| 1531.7897           | 1531.7384   | -0.0513 | -33   | 309        | 323 TALVANTSNMPVAAR   |           |         | Oxidation (M)[10] |      | Mascot      |
| 1781.8527           | 1781.7861   | -0.0666 | -37   | 365        | 381 LAEMPADSGYPAYLGAR |           |         |                   |      | Mascot      |
| 1797.8477           | 1797.7947   | -0.053  | -29   | 365        | 381 LAEMPADSGYPAYLGAR |           |         | Oxidation (M)[4]  |      | Mascot      |

## 8. 60 kDa heat shock protein

### Analysis Information

|                         |                                          |               |                     |
|-------------------------|------------------------------------------|---------------|---------------------|
| Report Type             | Protein+Peptide Summary by Spot          | Analysis Type | Combined (MS+MSMS)  |
| Sample Set Name         | 2011-05-04 [001300010097-2011-03-18-1]   | Database      | SwissProt           |
| Analysis Name           | Khali-Medicinal Chemistry[Mus Swissprot] | Creation Date | 05/04/2011 13:12:29 |
| Reported By             | 05/04/2011 17:22:28 - admin              | Last Modified | 05/04/2011 13:18:54 |
| MS Acq. : Proc. Methods | (Unspecified) : (Unspecified)            |               |                     |
| Interpretation Method   | (Unspecified)                            |               |                     |

| Gel Idx/Pos    | 333N11                                                              | Instr./Gel Origin      | Ak1152011-03-18-1 | Process Status       | Analysis Succeeded |                  |            |            |           |            |           |                     |
|----------------|---------------------------------------------------------------------|------------------------|-------------------|----------------------|--------------------|------------------|------------|------------|-----------|------------|-----------|---------------------|
| Plate [#] Name | [1] 001300010097                                                    | Instrument Sample Name |                   | Spectra              | 6                  |                  |            |            |           |            |           |                     |
| Rank           | Protein Name                                                        | Accession No.          | Protein Score     | Protein Score C.I. % | Total Ion Score    | Total Ion C.I. % | Protein MW | Protein PI | Spot Name | Pep. Count | User name | Department          |
|                | heat shock protein hsp60, hsp60=chaperonin [mouse, Peptide, 573 aa] | gi 247242              | 348               | 100                  | 274                | 100              | 61111.5    | 6.35       | H-B-4     | 14         | Kha       | Medicinal Chemistry |

| Peptide Information |             |         |       |            |                                 |           |         |              |      |             |
|---------------------|-------------|---------|-------|------------|---------------------------------|-----------|---------|--------------|------|-------------|
| Calc. Mass          | Obsrv. Mass | ± da    | ± ppm | Start Seq. | End Sequence Seq.               | Ion Score | C. I. % | Modification | Rank | Result Type |
| 901.5353            | 901.5007    | -0.0346 | -38   | 397        | 405 LSDGVAVLK                   |           |         |              |      | Mascot      |
| 912.5876            | 912.5194    | -0.0682 | -75   | 293        | 301 VGLQVAVK                    |           |         |              |      | Mascot      |
| 941.6141            | 941.5929    | -0.0212 | -23   | 463        | 470 IGIEIKR                     |           |         |              |      | Mascot      |
| 960.5109            | 960.4918    | -0.0191 | -20   | 421        | 429 VTDALNATR                   |           |         |              |      | Mascot      |
| 961.4849            | 961.4778    | -0.0071 | -7    | 302        | 310 APGFGDNRK                   |           |         |              |      | Mascot      |
| 1008.5359           | 1008.514    | -0.0219 | -22   | 122        | 130 SIAKEGFEK                   |           |         |              |      | Mascot      |
| 1017.5938           | 1017.539    | -0.0548 | -54   | 73         | 82 VTKDGVTVAK                   |           |         |              |      | Mascot      |
| 1097.6677           | 1097.6472   | -0.0205 | -19   | 517        | 526 GIIDPTKIVR                  |           |         |              |      | Mascot      |
| 1215.658            | 1215.6248   | -0.0332 | -27   | 482        | 493 NAGVEGSIVLK                 |           |         |              |      | Mascot      |
| 1344.7158           | 1344.6816   | -0.0342 | -25   | 61         | 72 TVIEQSVGSPK                  |           |         |              |      | Mascot      |
| 1389.705            | 1389.6661   | -0.0389 | -28   | 222        | 233 GYISPYFINTSK                | 38        | 96.123  |              |      | Mascot      |
| 1389.705            | 1389.6661   | -0.0389 | -28   | 222        | 233 GYISPYFINTSK                |           |         |              |      | Mascot      |
| 1630.9084           | 1630.896    | -0.0488 | -30   | 345        | 359 VGEVWTKDDAMLLK              |           |         |              |      | Mascot      |
| 1905.0552           | 1905.0034   | -0.0518 | -27   | 251        | 268 ISSVQSVPALEIANAHK           |           |         |              |      | Mascot      |
| 2560.2485           | 2560.1892   | -0.0793 | -31   | 97         | 121 LVQDVANNTEAEAGDGT TTATVLAAR | 236       | 100     |              |      | Mascot      |
| 2560.2485           | 2560.1892   | -0.0793 | -31   | 97         | 121 LVQDVANNTEAEAGDGT TTATVLAAR |           |         |              |      | Mascot      |

## 9. Creatine kinase B-type

### Analysis Information

|                         |                                           |               |                     |
|-------------------------|-------------------------------------------|---------------|---------------------|
| Report Type             | Protein-Peptide Summary by Spot           | Analysis Type | Combined (MS+MSMS)  |
| Sample Set Name         | 2011-05-04 [001300010097-2011-03-18-1]    | Database      | SwissProt           |
| Analysis Name           | Khalil-Medicinal Chemistry[Mus Swissprot] | Creation Date | 05/04/2011 13:12:29 |
| Reported By             | 05/04/2011 17:22:29 - admin               | Last Modified | 05/04/2011 13:18:54 |
| MS Acq. : Proc. Methods | (Unspecified) : (Unspecified)             |               |                     |
| Interpretation Method   | (Unspecified)                             |               |                     |

| Gel Idx/Pos    | 334N12                                                                                          | Instr./Gel Origin                 | Ak1152011-03-18-1 | Process Status       | Analysis Succeeded |                  |            |            |           |            |           |                     |
|----------------|-------------------------------------------------------------------------------------------------|-----------------------------------|-------------------|----------------------|--------------------|------------------|------------|------------|-----------|------------|-----------|---------------------|
| Plate [F] Name | [1] 001300010097                                                                                | Instrument Sample Name            |                   | Spectra              | 6                  |                  |            |            |           |            |           |                     |
| Rank           | Protein Name                                                                                    | Accession No.                     | Protein Score     | Protein Score C.I. % | Total Ion Score    | Total Ion C.I. % | Protein MW | Protein PI | Spot Name | Pep. Count | User name | Department          |
| 1              | RecName: Full=Creatine kinase B-type; AltName: Full=B-CK; AltName: Full=Creatine kinase B chain | gi 417208 sp Q04447.1 KCRB_MOU SE | 388               | 100                  | 295                | 100              | 42971.4    | 5.4        | H-B-5     | 12         | Khalil    | Medicinal Chemistry |

### Peptide Information

| Calc. Mass | Obsrv. Mass | ± da    | ± ppm | Start Seq. | End Sequence Seq.           | Ion Score | C. I. % | Modification        | Rank | Result Type |
|------------|-------------|---------|-------|------------|-----------------------------|-----------|---------|---------------------|------|-------------|
| 1031.5554  | 1031.5242   | -0.0312 | -30   | 359        | 366 LLEMEQR                 |           |         |                     |      | Mascot      |
| 1047.5903  | 1047.5157   | -0.0346 | -33   | 359        | 366 LLEMEQR                 |           |         | Oxidation (M)[5]    |      | Mascot      |
| 1154.5623  | 1154.5215   | -0.0408 | -35   | 243        | 252 GGNMKEVFTR              |           |         | Oxidation (M)[4]    |      | Mascot      |
| 1159.5491  | 1159.5503   | 0.0012  | 1     | 2          | 11 PFSNSHTGK                |           |         |                     |      | Mascot      |
| 1246.6313  | 1246.5916   | -0.0397 | -32   | 87         | 96 DLFDPIEER                | 69        | 100     |                     |      | Mascot      |
| 1246.6313  | 1246.5916   | -0.0397 | -32   | 87         | 96 DLFDPIEER                |           |         |                     |      | Mascot      |
| 1303.7256  | 1303.6785   | -0.0471 | -36   | 33         | 43 VLTPELYAELR              |           |         |                     |      | Mascot      |
| 1502.8577  | 1502.7997   | -0.058  | -39   | 33         | 45 VLTPELYAELRAK            |           |         |                     |      | Mascot      |
| 1602.8334  | 1602.7755   | -0.0579 | -36   | 157        | 172 LAVEALSLDGDLGSR         | 97        | 100     |                     |      | Mascot      |
| 1602.8334  | 1602.7755   | -0.0579 | -36   | 157        | 172 LAVEALSLDGDLGSR         |           |         |                     |      | Mascot      |
| 1672.821   | 1672.7568   | -0.0642 | -38   | 367        | 381 LEQQAQDILMPAQK          |           |         | Oxidation (M)[1]    |      | Mascot      |
| 1964.9308  | 1964.8582   | -0.0726 | -37   | 321        | 341 GTGGVDTAAVGGVFDVS NADR  | 129       | 100     |                     |      | Mascot      |
| 1964.9308  | 1964.8582   | -0.0726 | -37   | 321        | 341 GTGGVDTAAVGGVFDVS NADR  |           |         |                     |      | Mascot      |
| 2121.032   | 2120.9487   | -0.0833 | -39   | 320        | 341 RGTGGVDTAAVGGVFDV SNADR |           |         |                     |      | Mascot      |
| 2201.9556  | 2201.8713   | -0.0843 | -38   | 14         | 32 FPAEDEFPLDLSHNNHM AK     |           |         | Oxidation (M)[17]   |      | Mascot      |
| 2701.3535  | 2701.2354   | -0.1181 | -44   | 359        | 381 LLEMEQRLEQQAQDILMPAQK   |           |         | Oxidation (M)[5,19] |      | Mascot      |

## 10. Peroxiredoxin-2

### Analysis Information

|                         |                                           |               |                     |
|-------------------------|-------------------------------------------|---------------|---------------------|
| Report Type             | Protein-Peptide Summary by Spot           | Analysis Type | Combined (MS+MSMS)  |
| Sample Set Name         | 2011-05-04 [001300010097-2011-03-18-1]    | Database      | SwissProt           |
| Analysis Name           | Khalil-Medicinal Chemistry[Mus Swissprot] | Creation Date | 05/04/2011 13:12:29 |
| Reported By             | 05/04/2011 17:22:30 - admin               | Last Modified | 05/04/2011 13:18:54 |
| MS Acq. : Proc. Methods | (Unspecified) : (Unspecified)             |               |                     |
| Interpretation Method   | (Unspecified)                             |               |                     |

| Gel Idx/Pos    | 335N13                                                                                             | Instr./Gel Origin                  | Ak1152011-03-18-1 | Process Status       | Analysis Succeeded |                  |            |            |           |            |           |                     |
|----------------|----------------------------------------------------------------------------------------------------|------------------------------------|-------------------|----------------------|--------------------|------------------|------------|------------|-----------|------------|-----------|---------------------|
| Plate [F] Name | [1] 001300010097                                                                                   | Instrument Sample Name             |                   | Spectra              | 6                  |                  |            |            |           |            |           |                     |
| Rank           | Protein Name                                                                                       | Accession No.                      | Protein Score     | Protein Score C.I. % | Total Ion Score    | Total Ion C.I. % | Protein MW | Protein PI | Spot Name | Pep. Count | User name | Department          |
| 1              | RecName: Full=Peroxiredoxin-2; AltName: Full=Thio-specific antioxidant protein; Short=TSA; AltName | gi 2499469 sp Q36117.1 PRDX2_MOUSE | 283               | 100                  | 240                | 100              | 21936.1    | 5.2        | H-B-6     | 6          | Khalil    | Medicinal Chemistry |

### Peptide Information

| Calc. Mass | Obsrv. Mass | ± da    | ± ppm | Start Seq. | End Sequence Seq.     | Ion Score | C. I. % | Modification | Rank | Result Type |
|------------|-------------|---------|-------|------------|-----------------------|-----------|---------|--------------|------|-------------|
| 937.4373   | 937.4006    | -0.0367 | -39   | 120        | 127 NDEGIAYR          |           |         |              |      | Mascot      |
| 976.488    | 976.4149    | -0.0731 | -75   | 1          | 10 MASGNAIQIGK        |           |         |              |      | Mascot      |
| 1023.5499  | 1023.4988   | -0.0481 | -47   | 27         | 34 EKLSDYR            |           |         |              |      | Mascot      |
| 1108.5997  | 1108.5618   | -0.0379 | -34   | 110        | 119 SLSQNYGVLK        |           |         |              |      | Mascot      |
| 1211.6743  | 1211.631    | -0.0433 | -36   | 140        | 150 QITVNDLPVGR       | 91        | 100     |              |      | Mascot      |
| 1211.6743  | 1211.631    | -0.0433 | -36   | 140        | 150 QITVNDLPVGR       |           |         |              |      | Mascot      |
| 2027.0192  | 2026.9398   | -0.0794 | -39   | 110        | 127 SLSQNYGVLNDEGIAYR | 149       | 100     |              |      | Mascot      |
| 2027.0192  | 2026.9398   | -0.0794 | -39   | 110        | 127 SLSQNYGVLNDEGIAYR |           |         |              |      | Mascot      |

## 11. Cytochrome b-c1 complex subunit 2

### Analysis Information

Report Type Protein-Peptide Summary by Spot Analysis Type Combined (MS+MSMS)  
 Sample Set Name 2011-05-04 [001300010097-2011-03-18-1] Database SwissProt  
 Analysis Name Khalil-Medicinal Chemistry[Mus Swissprot] Creation Date 05/04/2011 13:12:29  
 Reported By 05/04/2011 17:22:32 - admin Last Modified 05/04/2011 13:18:54  
 MS Acq.: Proc. Methods (Unspecified): (Unspecified)  
 Interpretation Method (Unspecified)

| Rank | Protein Name                                                                                        | Accession No.                      | Protein Score | Protein Score C. I. % | Total Ion Score | Total Ion C. I. % | Protein MW | Protein Spot Name PI | Pep. User name | Department          |
|------|-----------------------------------------------------------------------------------------------------|------------------------------------|---------------|-----------------------|-----------------|-------------------|------------|----------------------|----------------|---------------------|
| 1    | RecName: Full=Cytochrome b-c1 complex subunit 2, mitochondrial; AltName: Full=Complex III subunit 2 | gi 14548302 sp Q9DB77.1 QCR2_MOUSE | 323           | 100                   | 252             | 100               | 48262      | 9.26 H-H-4           | 11 Khalil      | Medicinal Chemistry |

| Peptide Information |             |         |       |            |                        |           |         |                    |      |             |
|---------------------|-------------|---------|-------|------------|------------------------|-----------|---------|--------------------|------|-------------|
| Calc. Mass          | Obsrv. Mass | ± da    | ± ppm | Start Seq. | End Sequence Seq.      | Ion Score | C. I. % | Modification       | Rank | Result Type |
| 1000.5686           | 1000.5305   | -0.0381 | -38   | 148        | 155 RWEVAALR           |           |         |                    |      | Mascot      |
| 1121.5898           | 1121.5382   | -0.0316 | -28   | 183        | 172 AVAFQNSQTR         | 60        | 99.996  |                    |      | Mascot      |
| 1235.6201           | 1235.5747   | -0.0454 | -37   | 232        | 241 QVAEQFLNMR         |           |         |                    |      | Mascot      |
| 1251.615            | 1251.5726   | -0.0424 | -34   | 232        | 241 QVAEQFLNMR         | 13        |         | 0 Oxidation (M)[9] |      | Mascot      |
| 1251.615            | 1251.5726   | -0.0424 | -34   | 232        | 241 QVAEQFLNMR         |           |         | Oxidation (M)[9]   |      | Mascot      |
| 1262.6528           | 1262.5868   | -0.066  | -52   | 7          | 17 AGSFSPFYSLK         |           |         |                    |      | Mascot      |
| 1282.6096           | 1282.5726   | -0.037  | -29   | 117        | 127 ENMAYVEGIR         |           |         |                    |      | Mascot      |
| 1298.6045           | 1298.5636   | -0.0409 | -31   | 117        | 127 ENMAYVEGIR         |           |         | Oxidation (M)[3]   |      | Mascot      |
| 1314.7052           | 1314.6622   | -0.043  | -33   | 173        | 183 IENLHDVAYK         |           |         |                    |      | Mascot      |
| 1419.7438           | 1419.6941   | -0.0497 | -35   | 302        | 315 GNNTTSLLSQSVAK     |           |         |                    |      | Mascot      |
| 1477.7758           | 1477.7301   | -0.0457 | -31   | 160        | 172 IDKAVAFQNSQTR      |           |         |                    |      | Mascot      |
| 1529.7917           | 1529.7397   | -0.052  | -34   | 360        | 375 AVAOGNLLSSADVQAAK  | 96        | 100     |                    |      | Mascot      |
| 1529.7917           | 1529.7397   | -0.052  | -34   | 360        | 375 AVAOGNLLSSADVQAAK  |           |         |                    |      | Mascot      |
| 1618.782            | 1618.724    | -0.058  | -36   | 71         | 84 YEDSNLGTSHLLR       | 83        | 100     |                    |      | Mascot      |
| 1618.782            | 1618.724    | -0.058  | -36   | 71         | 84 YEDSNLGTSHLLR       |           |         |                    |      | Mascot      |
| 2179.0966           | 2179.9951   | -0.1015 | -47   | 200        | 217 ITSEELHYFVQNHFTSAR |           |         |                    |      | Mascot      |

## 12. Acetyl-CoA acetyltransferase

### Analysis Information

Report Type Protein-Peptide Summary by Spot Analysis Type Combined (MS+MSMS)  
 Sample Set Name 2011-05-04 [001300010097-2011-03-18-1] Database SwissProt  
 Analysis Name Khalil-Medicinal Chemistry[Mus Swissprot] Creation Date 05/04/2011 13:12:29  
 Reported By 05/04/2011 17:22:28 - admin Last Modified 05/04/2011 13:18:54  
 MS Acq.: Proc. Methods (Unspecified): (Unspecified)  
 Interpretation Method (Unspecified)

| Rank | Protein Name                                                         | Accession No. | Protein Score | Protein Score C. I. % | Total Ion Score | Total Ion C. I. % | Protein MW | Protein Spot Name PI | Pep. User name | Department          |
|------|----------------------------------------------------------------------|---------------|---------------|-----------------------|-----------------|-------------------|------------|----------------------|----------------|---------------------|
|      | acetyl-CoA acetyltransferase, mitochondrial precursor [Mus musculus] | gi 21450129   | 81            | 99.879                | 68              | 99.996            | 45129.5    | 8.71 H-H-4           | 4 Khalil       | Medicinal Chemistry |

| Peptide Information |             |         |       |            |                        |           |         |                  |      |             |
|---------------------|-------------|---------|-------|------------|------------------------|-----------|---------|------------------|------|-------------|
| Calc. Mass          | Obsrv. Mass | ± da    | ± ppm | Start Seq. | End Sequence Seq.      | Ion Score | C. I. % | Modification     | Rank | Result Type |
| 910.5832            | 910.5497    | -0.0335 | -37   | 301        | 308 LNVKPLAR           |           |         |                  |      | Mascot      |
| 973.5023            | 973.4964    | -0.0059 | -6    | 363        | 370 MLEIDPQK           |           |         |                  |      | Mascot      |
| 1561.7129           | 1561.662    | -0.0509 | -33   | 206        | 218 QEODTYALSSYTR      | 68        | 99.996  |                  |      | Mascot      |
| 1561.7129           | 1561.662    | -0.0509 | -33   | 206        | 218 QEODTYALSSYTR      |           |         |                  |      | Mascot      |
| 2179.0085           | 2178.9951   | -0.0534 | -25   | 201        | 218 MNISRQEODTYALSSYTR |           |         | Oxidation (M)[1] |      | Mascot      |

### 13. Cytochrome c1

#### Analysis Information

|                        |                                        |               |                     |
|------------------------|----------------------------------------|---------------|---------------------|
| Report Type            | Protein-Peptide Summary by Spot        | Analysis Type | Combined (MS+MSMS)  |
| Sample Set Name        | 2011-05-04 [001300010097-2011-03-18-1] | Database      | SwissProt           |
| Analysis Name          | KhaII-Medical Chemistry[Mus Swissprot] | Creation Date | 05/04/2011 13:12:29 |
| Reported By            | 05/04/2011 17:22:34 - admin            | Last Modified | 05/04/2011 13:18:54 |
| MS Acq.: Proc. Methods | (Unspecified) : (Unspecified)          |               |                     |
| Interpretation Method  | (Unspecified)                          |               |                     |

| Gel Idx/Pos    | 342N20                                                                                             | Instr./Gel Origin                 | Ak1152011-03-18-1 |                | Process Status  | Analysis Succeeded |            |                   |                |                     |
|----------------|----------------------------------------------------------------------------------------------------|-----------------------------------|-------------------|----------------|-----------------|--------------------|------------|-------------------|----------------|---------------------|
| Plate [#] Name | [1] 001300010097                                                                                   | Instrument Sample Name            |                   |                | Spectra         | 6                  |            |                   |                |                     |
| Rank           | Protein Name                                                                                       | Accession No.                     | Protein Score     | Protein C.I. % | Total Ion Score | Total Ion C.I. %   | Protein MW | Protein Spot Name | Pep. User name | Department          |
| 1              | RecName: Full=Cytochrome c1, heme protein, mitochondrial; AltName: Full=Complex III subunit 4; A/N | gi 21750079 sp Q9DOM3.1 CY1_MOUSE | 277               | 100            | 252             | 100                | 35533      | 9.24 H-K-5        | 5 KhaII        | Medicinal Chemistry |

#### Peptide Information

| Calc. Mass | Obsrv. Mass | ± da    | ± ppm | Start Seq. | End Sequence Seq. | Ion Score        | C. I. % | Modification     | Rank | Result Type |
|------------|-------------|---------|-------|------------|-------------------|------------------|---------|------------------|------|-------------|
| 972.5989   | 972.5772    | -0.0217 | -22   | 318        | 325               | KLAYRPPK         |         |                  |      | Mascot      |
| 1033.5571  | 1033.5402   | -0.0169 | -16   | 1          | 10                | MAAAAALRR        |         | Oxidation (M)[1] |      | Mascot      |
| 1298.7053  | 1298.7196   | 0.0133  | 10    | 100        | 111               | GLSSLDHTSIK      | 62      | 99.998           |      | Mascot      |
| 1298.7053  | 1298.7196   | 0.0133  | 10    | 100        | 111               | GLSSLDHTSIK      |         |                  |      | Mascot      |
| 1670.896   | 1670.8984   | 0.0124  | 7     | 187        | 202               | AANNGALPPDLSYIVR | 96      | 100              |      | Mascot      |
| 1670.896   | 1670.8984   | 0.0124  | 7     | 187        | 202               | AANNGALPPDLSYIVR |         |                  |      | Mascot      |
| 1864.9229  | 1864.9381   | 0.0152  | 8     | 171        | 186               | LSDYFPKYPNPEAAR  | 93      | 100              |      | Mascot      |
| 1864.9229  | 1864.9381   | 0.0152  | 8     | 171        | 186               | LSDYFPKYPNPEAAR  |         |                  |      | Mascot      |

### 14. Proteasome subunit alpha type-6

#### Analysis Information

|                        |                                        |               |                     |
|------------------------|----------------------------------------|---------------|---------------------|
| Report Type            | Protein-Peptide Summary by Spot        | Analysis Type | Combined (MS+MSMS)  |
| Sample Set Name        | 2011-05-04 [001300010097-2011-03-18-1] | Database      | SwissProt           |
| Analysis Name          | KhaII-Medical Chemistry[Mus Swissprot] | Creation Date | 05/04/2011 13:12:29 |
| Reported By            | 05/04/2011 17:22:34 - admin            | Last Modified | 05/04/2011 13:18:54 |
| MS Acq.: Proc. Methods | (Unspecified) : (Unspecified)          |               |                     |
| Interpretation Method  | (Unspecified)                          |               |                     |

| Gel Idx/Pos    | 342N20                                                                                              | Instr./Gel Origin                 | Ak1152011-03-18-1 |                | Process Status  | Analysis Succeeded |            |                   |                |                     |
|----------------|-----------------------------------------------------------------------------------------------------|-----------------------------------|-------------------|----------------|-----------------|--------------------|------------|-------------------|----------------|---------------------|
| Plate [#] Name | [1] 001300010097                                                                                    | Instrument Sample Name            |                   |                | Spectra         | 6                  |            |                   |                |                     |
| Rank           | Protein Name                                                                                        | Accession No.                     | Protein Score     | Protein C.I. % | Total Ion Score | Total Ion C.I. %   | Protein MW | Protein Spot Name | Pep. User name | Department          |
| 1              | RecName: Full=Proteasome subunit alpha type-6; AltName: Full=Macropain iota chain; AltName: Full=Mu | gi 9910829 sp Q9QUM9.1 PSA6_MOUSE | 170               | 100            | 147             | 100                | 27811      | 6.34 H-K-5        | 5 KhaII        | Medicinal Chemistry |

#### Peptide Information

| Calc. Mass | Obsrv. Mass | ± da   | ± ppm | Start Seq. | End Sequence Seq. | Ion Score      | C. I. % | Modification           | Rank | Result Type |
|------------|-------------|--------|-------|------------|-------------------|----------------|---------|------------------------|------|-------------|
| 1033.5347  | 1033.5402   | 0.0055 | 5     | 46         | 54                | DCAVWVTKK      |         | Carbamidomethyl (C)[2] |      | Mascot      |
| 1156.611   | 1156.627    | 0.016  | 14    | 12         | 21                | HITFSPGGR      | 58      | 99.994                 |      | Mascot      |
| 1156.611   | 1156.627    | 0.016  | 14    | 12         | 21                | HITFSPGGR      |         |                        |      | Mascot      |
| 1170.532   | 1170.6147   | 0.0827 | 71    | 1          | 11                | MSRGSSAGFDR    |         |                        |      | Mascot      |
| 1285.7223  | 1285.7378   | 0.0155 | 12    | 31         | 43                | AINQGGLTSVAIVR | 90      | 100                    |      | Mascot      |
| 1285.7223  | 1285.7378   | 0.0155 | 12    | 31         | 43                | AINQGGLTSVAIVR |         |                        |      | Mascot      |

## 15. Proteasome subunit alpha type-4

### Analysis Information

|                         |                                           |               |                     |
|-------------------------|-------------------------------------------|---------------|---------------------|
| Report Type             | Protein-Peptide Summary by Spot           | Analysis Type | Combined (MS+MSMS)  |
| Sample Set Name         | 2011-05-04 [001300010097-2011-03-18-1]    | Database      | SwissProt           |
| Analysis Name           | Khalil-Medicinal Chemistry[Mus Swissprot] | Creation Date | 05/04/2011 13:12:29 |
| Reported By             | 05/04/2011 17:22:35 - admin               | Last Modified | 05/04/2011 13:18:54 |
| MS Acq. : Proc. Methods | (Unspecified) : (Unspecified)             |               |                     |
| Interpretation Method   | (Unspecified)                             |               |                     |

| Gel Idx/Pos    | 343N21                                                                                                                | Instr./Gel Origin                | Ak115/2011-03-18-1 |                       | Process Status  | Analysis Succeeded |            |                      |                |                     |
|----------------|-----------------------------------------------------------------------------------------------------------------------|----------------------------------|--------------------|-----------------------|-----------------|--------------------|------------|----------------------|----------------|---------------------|
| Plate [r] Name | [1]001300010097                                                                                                       | Instrument Sample Name           |                    |                       | Spectra         | 6                  |            |                      |                |                     |
| Rank           | Protein Name                                                                                                          | Accession No.                    | Protein Score      | Protein Score C. I. % | Total Ion Score | Total Ion C. I. %  | Protein MW | Protein Spot Name PI | Pep. User name | Department          |
| 1              | RecName: Full=Proteasome subunit alpha type-4; AltName: Full=Macropain subunit C9; AltName: Full=Mu R1P0.1 PSA4_MOUSE | g 9910830 sp Q9R1P0.1 PSA4_MOUSE | 159                | 100                   | 127             | 100                | 29737.3    | 7.59 H-K-6           | 6 Khalil       | Medicinal Chemistry |

| Peptide Information |             |         |       |            |                   |           |         |                  |      |             |
|---------------------|-------------|---------|-------|------------|-------------------|-----------|---------|------------------|------|-------------|
| Calc. Mass          | Obsrv. Mass | ± da    | ± ppm | Start Seq. | End Sequence Seq. | Ion Score | C. I. % | Modification     | Rank | Result Type |
| 9025305             | 9025261     | -0.0044 | -5    | 211        | 218 VEIATLTR      |           |         |                  |      | Mascot      |
| 9994894             | 9995169     | 0.0275  | 28    | 119        | 127 QAYTQFGGK     |           |         |                  |      | Mascot      |
| 10075156            | 10075313    | 0.0157  | 16    | 9          | 17 TTIFSPQGR      | 52        | 99.975  |                  |      | Mascot      |
| 10075156            | 10075313    | 0.0157  | 16    | 9          | 17 TTIFSPQGR      |           |         |                  |      | Mascot      |
| 12268304            | 1226845     | 0.0148  | 12    | 95         | 64 LLEVFVFSEK     |           |         |                  |      | Mascot      |
| 13576304            | 13577034    | 0.073   | 54    | 177        | 187 QDYKEGEMTLK   |           |         | Oxidation (M)[8] |      | Mascot      |
| 14308213            | 14308401    | 0.0188  | 13    | 208        | 218 LSAEKVEIATLTR | 75        | 100     |                  |      | Mascot      |
| 14308213            | 14308401    | 0.0188  | 13    | 208        | 218 LSAEKVEIATLTR |           |         |                  |      | Mascot      |
